# Supplementary material for: A copper missile-triggered power coalescence and death vortex within tumor cell mitochondria for synergistic cuproptosis/phototherapy/chemotherapy
Source: Royal Society of Chemistry journal article supplement (doi:10.1039/d4nr02382j), 2024-01-01
Supplement: d4nr02382j1.pdf [file d4nr02382j1.pdf]

## Supporting Information

# **A copper missile triggered power coalescence and death vortex within tumor cell mitochondria for synergistic cuproptosis/phototherapy/chemotherapy**

**Yicheng Jiang<sup>a, c</sup>, Shuhan He<sup>a</sup>, Niu Xiang<sup>a</sup>, Linghui Duan<sup>a</sup>, Yuxiang Lin<sup>a</sup>, Wenyu Huang<sup>a</sup>, Zhenghong Wu<sup>a, \*</sup>, and Xiaole Qi<sup>a, b, \*</sup>**

*<sup>a</sup> Key Laboratory of Modern Chinese Medicines, China Pharmaceutical University, Nanjing 210009, PR China.*

*<sup>b</sup> Industrial Technology Innovation Platform, Zhejiang Center for Safety Study of Drug Substances, Hangzhou 310018, China.*

*<sup>c</sup> Center of Advanced Pharmaceuticals and Biomaterials, Ningbo Institute of Marine Medicine, Peking University, Ningbo 315832, China.*

\* Corresponding authors. Tel./fax: +86 15062208341 (Zhenghong Wu); +86 25 83179703 (Xiaole Qi).

E-mail addresses: zhenghongwu66@cpu.edu.cn (Zhenghong Wu),  
qixiaole523@cpu.edu.cn (Xiaole Qi)

## Supplement experimental section

### Calculation of photothermal conversion efficiency (PCE)

The photothermal conversion efficiency of CCTH NPs (1 mL, 100  $\mu\text{g/mL}$ ) under 808 nm laser with a power density of 2.0  $\text{W/cm}^2$  was detected according to the previous method.<sup>1, 2</sup>

Detailed calculation was given as follows:

$$\eta = \frac{hS(T_{max} - T_{sur}) - Q_{dis}}{I(1 - 10^{-A_{808\text{ nm}}})} \times 100\% \quad (1)$$

Where  $h$  is the heat transfer coefficient, and  $S$  is the surface area of the container.  $T_{max}$  and  $T_{sur}$  are the maximum steady temperatures of the CCTH NPs' dispersion and the environmental temperature, respectively.  $Q_{dis}$  is expressed as the dissipated heat from light absorbed by the system.  $I$  is the power of the 808 nm laser, and  $A_{808\text{ nm}}$  is the corresponding absorbance of the NP dispersion at 808 nm. Among them,  $hS$  can be given by the following Equation 2~4.

$$hS = \frac{\sum_i m_i C_{p, i}}{\tau_s} \quad (2)$$

$$\tau_s = -\ln\theta \quad (3)$$

$$\theta = \frac{T(t) - T_{sur}}{T_{max} - T_{sur}} \quad (4)$$

Where  $m$  and  $C_p$  are the sample mass, and the specific heat capacity of the medium solution, respectively, and  $t$  is the time to cool to room temperature after irradiation.

### *In vitro* tumor selectivity evaluation

Tumor selectivity of drug carriers (CuS-TPP-HA NPs) was measured by MTT assay (KeyGEN, China). 4T1 and LO2 cells were seeded into 96-well plates ( $1 \times 10^4$  cells per well) and adaptively cultured for 24 h. Then, the cells were treated with CuS-TPP-HA NPs dispersion at various concentrations (0, 10, 20, 30, 40, 50, 100  $\mu\text{g/mL}$ ). Every group has six parallel samples. After 24 h incubation, the cells were washed with PBS 3 times. Then, the

medium was withdrawn, and 50  $\mu\text{L}$  of 1 $\times$ MTT solution was added into each well and incubated for another 4 h to reduce MTT to formazan. After aspirating the supernatant, 150  $\mu\text{L}$  of DMSO was added to dissolve formazan, and the plates were shaken gently for 30 min. The absorbance of the medium solution at 490 nm was detected by a microplate reader (Allsheng, China).

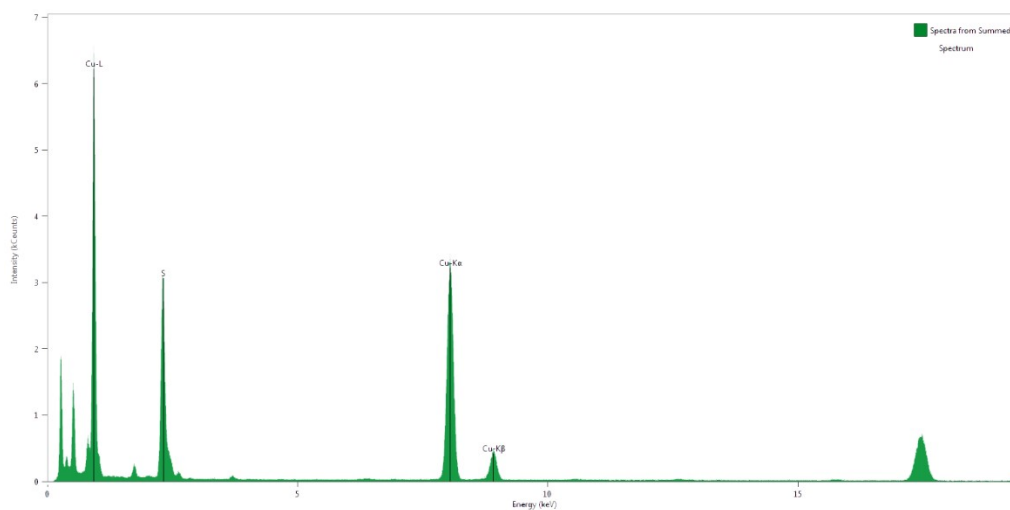

**Figure S1.** The XPS spectra of CuS nanoparticles.

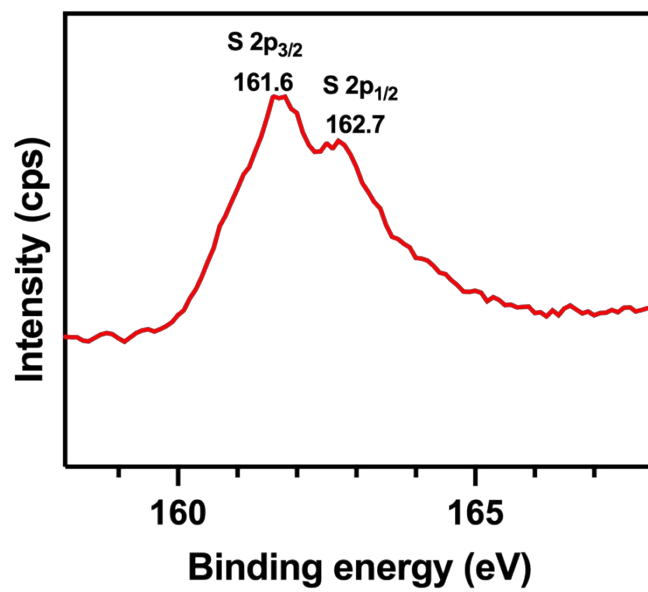

**Figure S2.** The S 2p XPS spectra of the CuS nanoparticles.

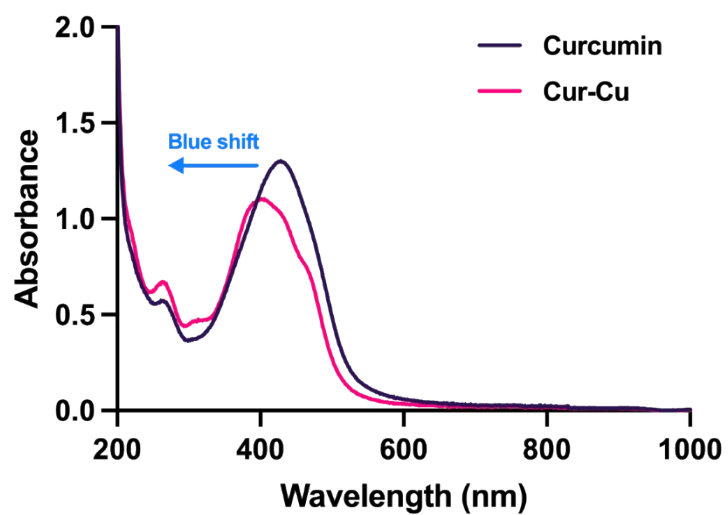

**Figure S3.** The UV-Vis spectra of curcumin and curcumin-copper complex.

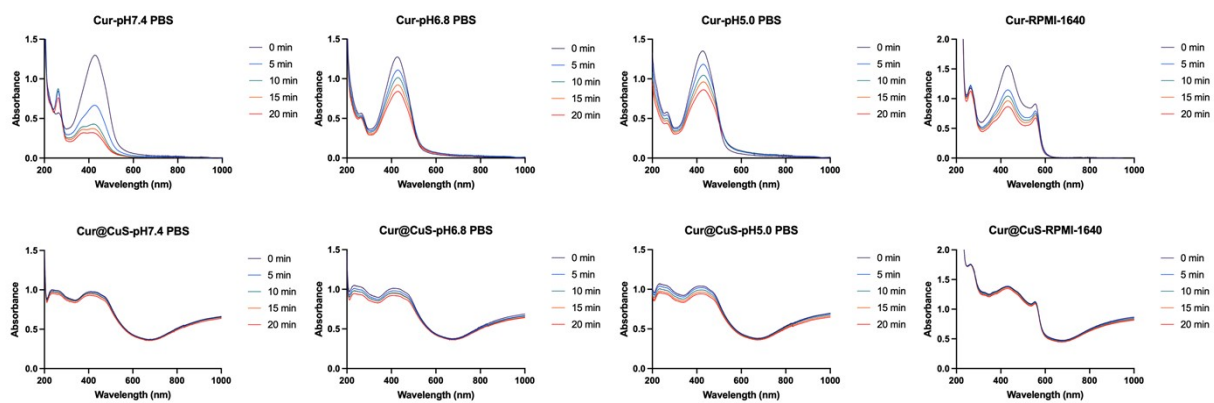

**Figure S4.** The UV-Vis absorption spectra of curcumin and Cur@CuS in the different PBS solutions and in the RPMI-1640 medium during a 20-minute period.

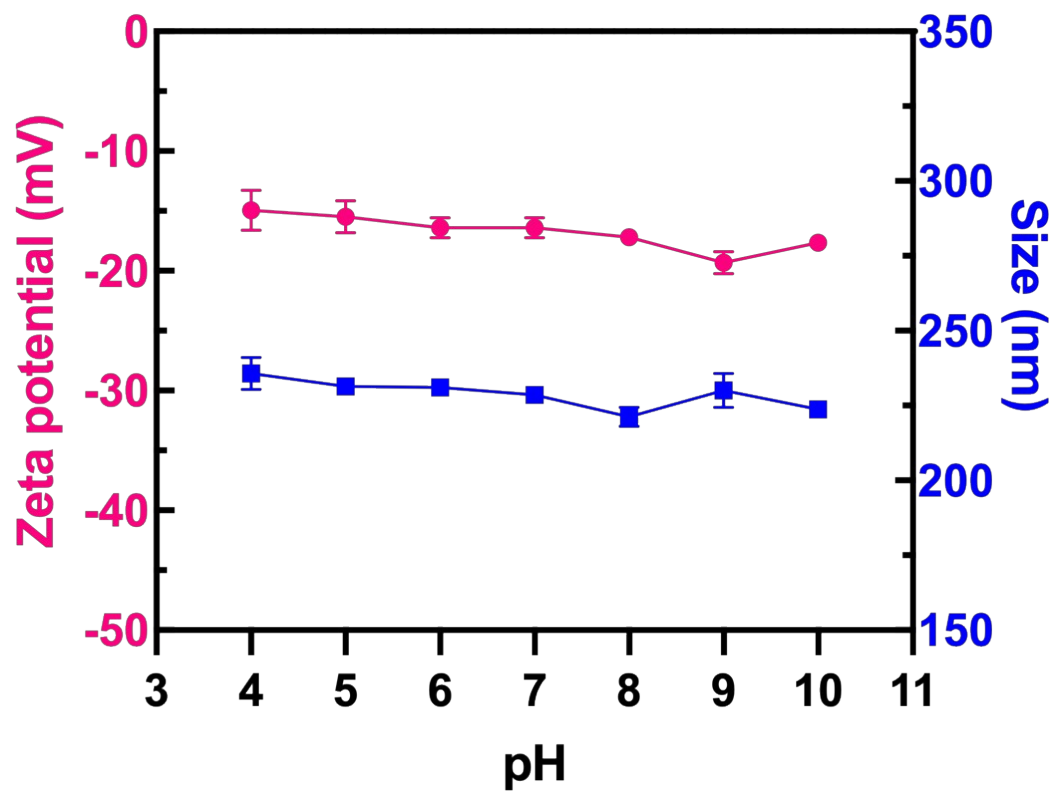

**Figure S5.** The particle size and zeta potential of CCTH NPs in PBS solution with pH 4 to 10 (n=3).



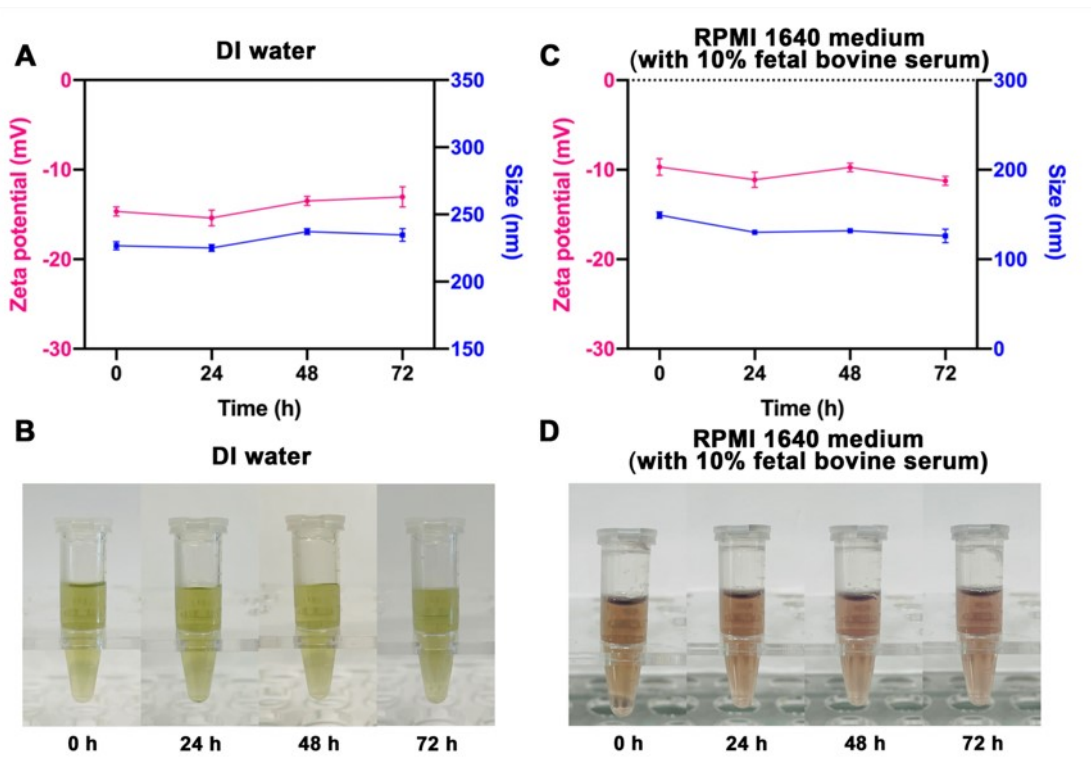

**Figure S6.** The particle size, zeta potential, and appearance of CCTH NPs A-B) in the deionized water and C-D) in the cell culture medium (RPMI-1640 medium with 10% fetal bovine serum) at the designated time points (n=3).

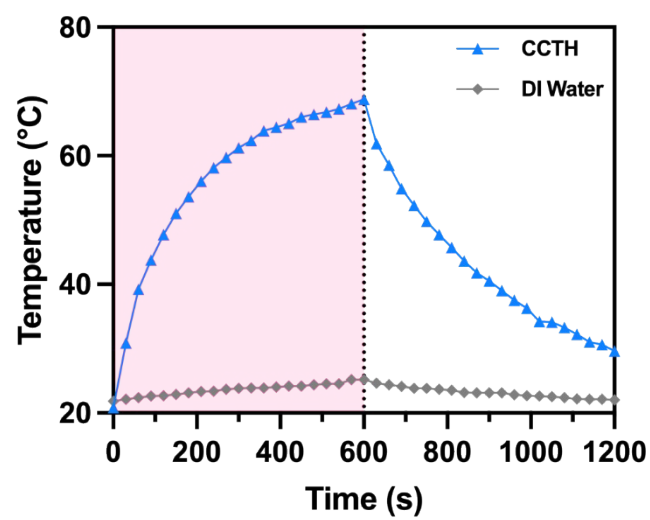

**Figure S7.** The heating and cooling curves of CCTH solution under NIR irradiation (808 nm, 2 W/cm<sup>2</sup>).

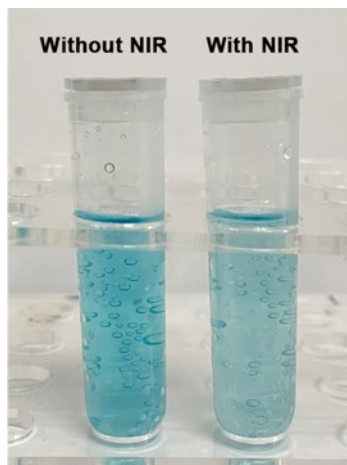

**Figure S8.** The MB solution after incubation with CCTH NPs for 10 min with (right) and without (left) NIR irradiation (808 nm, 1 W/cm<sup>2</sup>, 10 min).

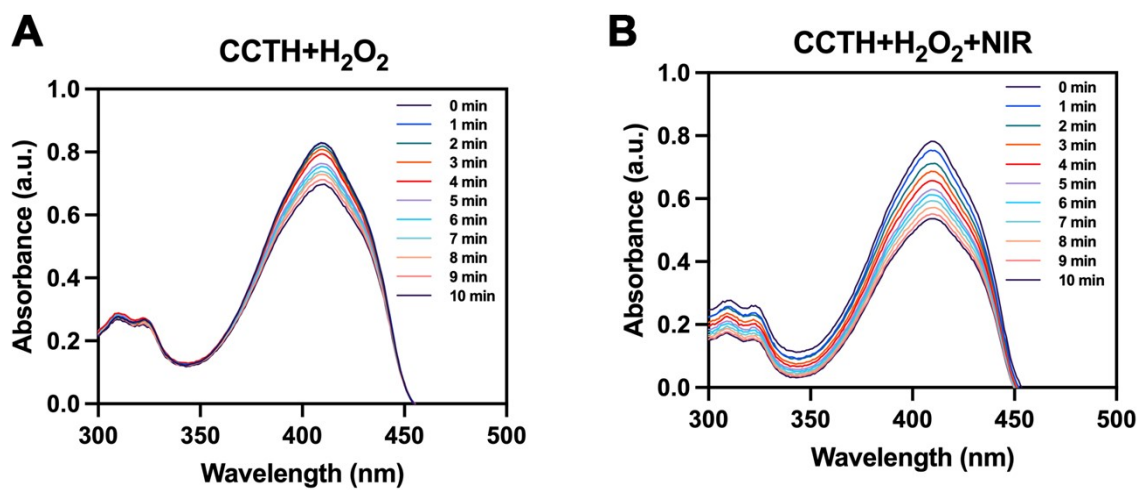

**Figure S9.** The UV-Vis absorption of DPBF after incubation with CCTH NPs A) with or B) without NIR irradiation (808 nm, 1 W/cm<sup>2</sup>, 10 min).

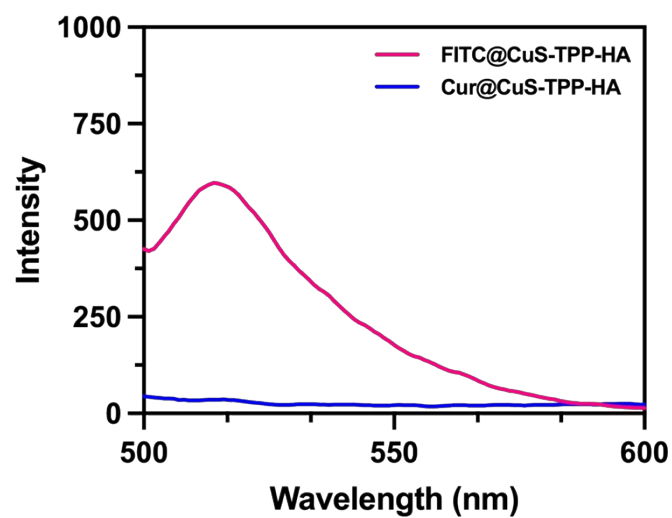

**Figure S10.** The fluorescence spectrum of Cur@CuS-TPP-HA NPs and FITC@CuS-TPP-HA NPs.

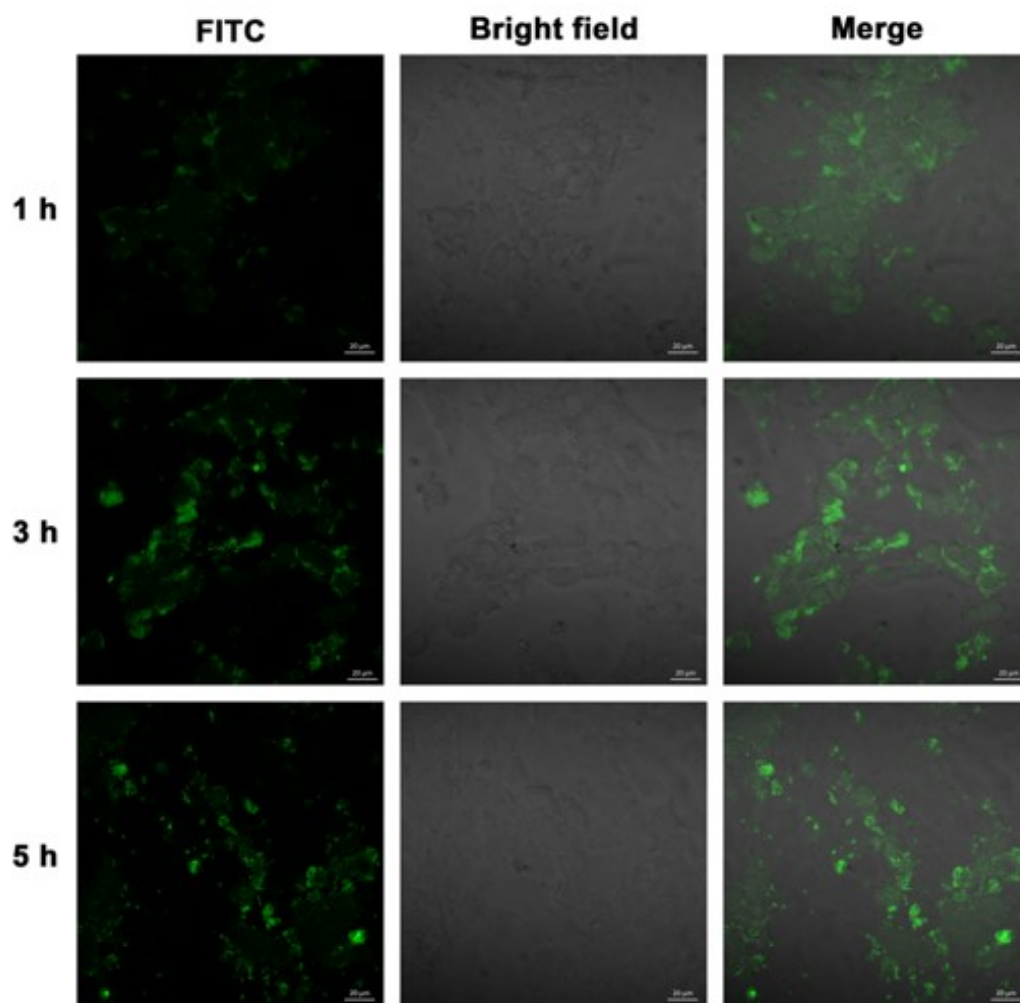

**Figure S11.** CLSM images of 4T1 cells incubated with FITC@CuS-TPP-HA NPs for different periods, Scale bar: 20 μm.

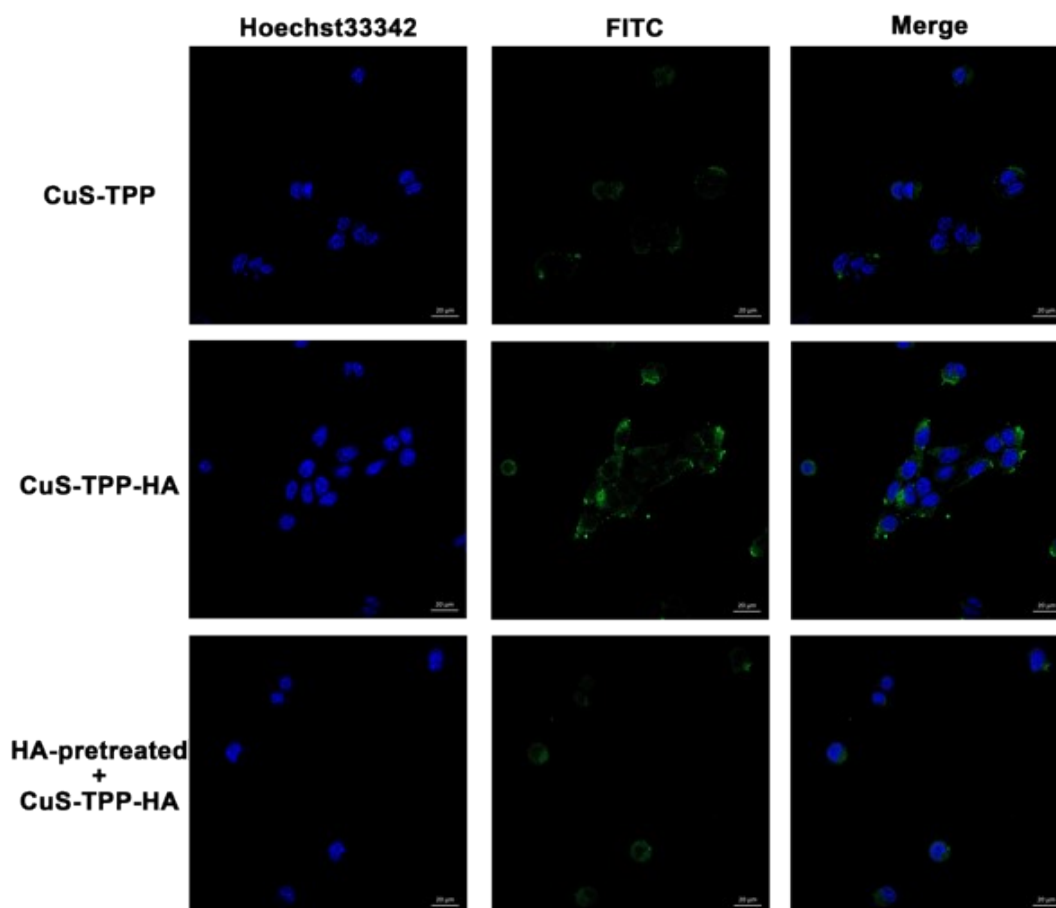

**Figure S12.** CLSM images of 4T1 cells incubated with FITC@CuS-TPP NPs, FITC@CuS-TPP-HA NPs, and FITC@CuS-TPP-HA NPs (with HA-pretreated) for four hours. Scale bar: 20 μm.

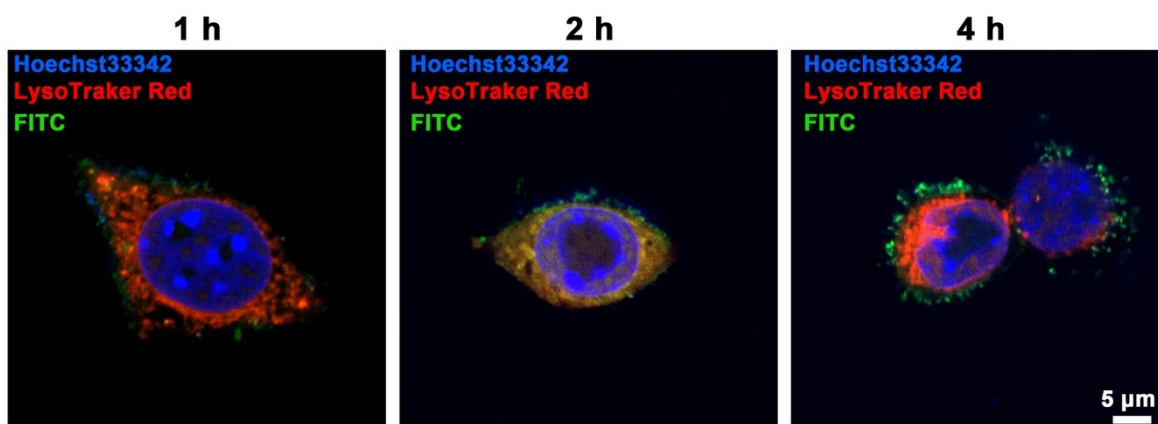

**Figure S13.** Intracellular localization of the F@CTH NPs and lysosome in 4T1 cells. Scale bar: 5 μm.



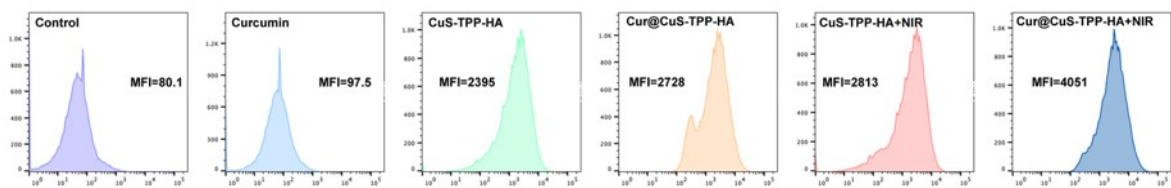

**Figure S14.** Flow cytometry analysis of the intracellular ROS content in different groups.

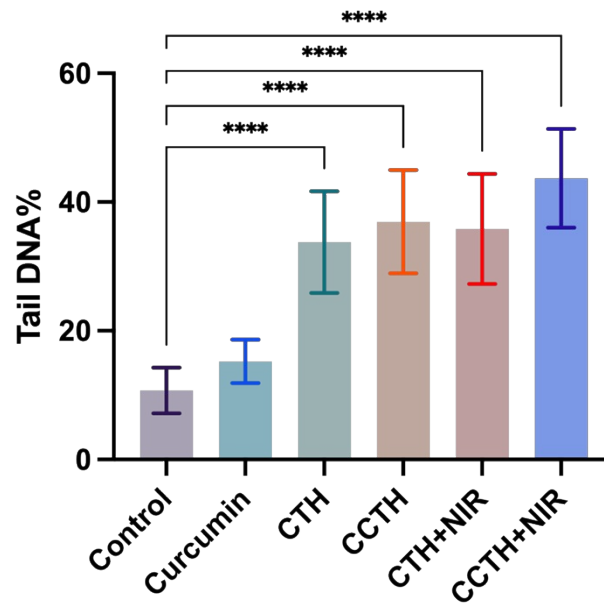

**Figure S15.** The content of tail DNA in 4T1 cells after different treatments was analyzed from the comet assay result (n=50). Data are shown as mean  $\pm$  SD, p-values are calculated using one-way ANOVA, \*\*\*\* $p$ <0.0001.

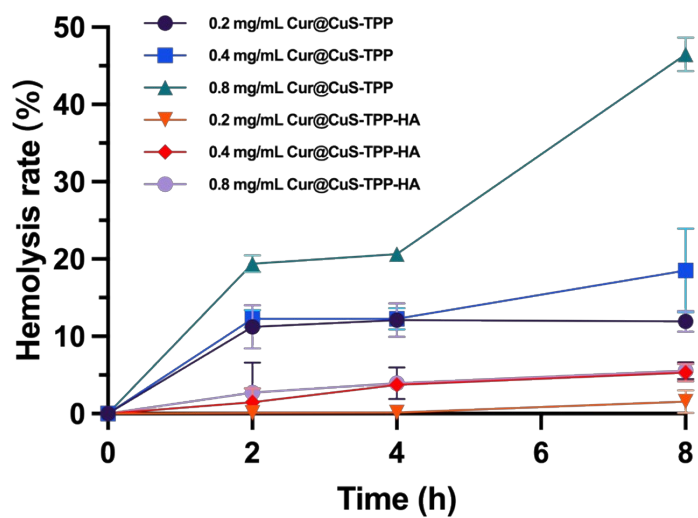

**Figure S16.** The hemolysis rate of Cur@CuS-TPP NPs and Cur@CuS-TPP-HA NPs at various concentrations (n=3).

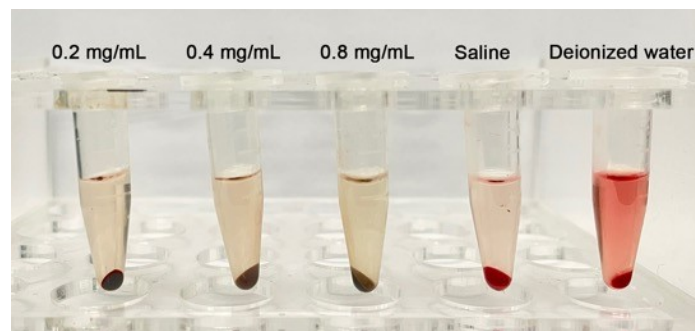

**Figure S17.** The photograph of RBC solutions after incubation with different concentrations of CCTH NPs. Deionized water and saline were employed as positive and negative controls, respectively.

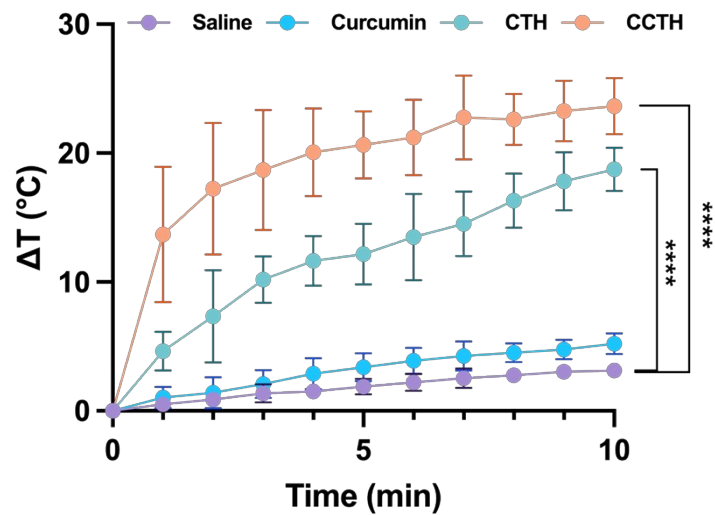

**Figure S18.** Temperature change curves of tumor sites in different groups under NIR irradiation (808 nm, 1 W/cm<sup>2</sup>, 10 min) (n=3). Data are shown as mean ± SD, p-values are calculated using one-way ANOVA, \*\*\*\**p*<0.0001.

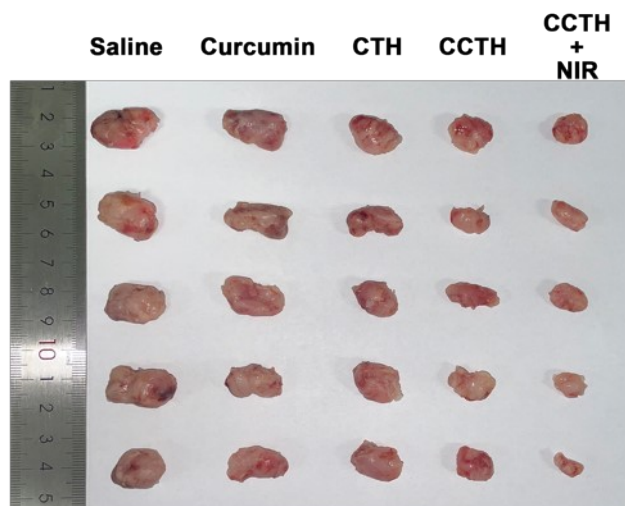

**Figure S19.** The photographs of tumor tissue in different groups were obtained on day 14.

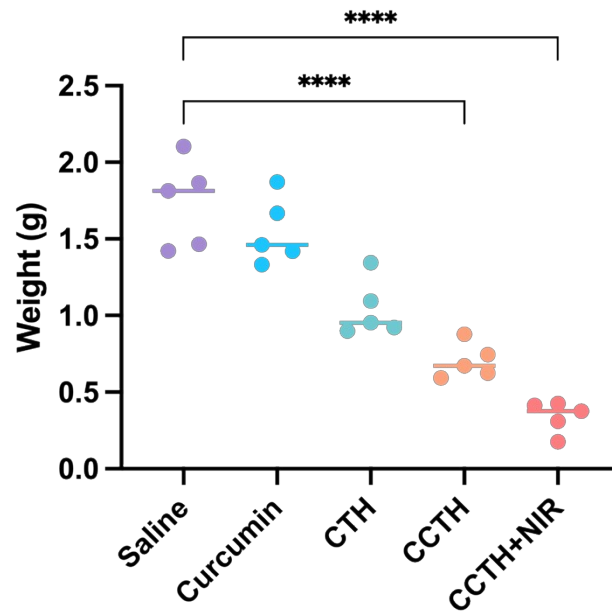

**Figure S20.** The weight of tumor tissue in different groups was obtained on day 14 (n=6).

Data are shown as mean  $\pm$  SD, p-values are calculated using one-way ANOVA, \*\*\*\* $p < 0.0001$ .

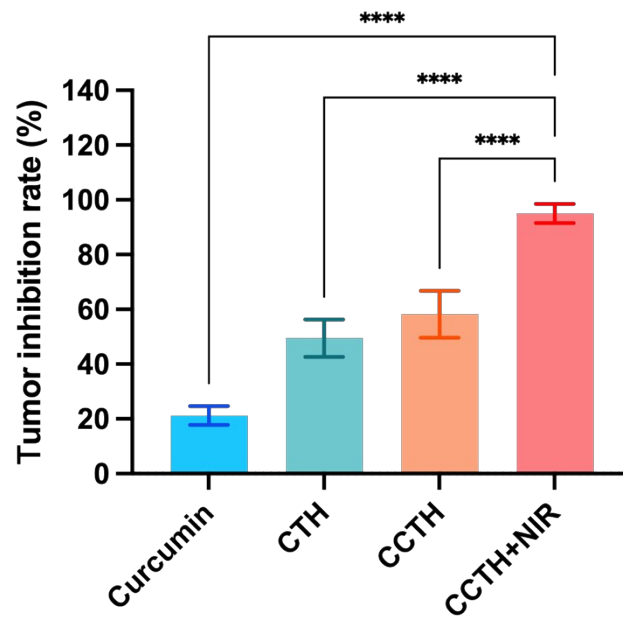

**Figure S21.** The tumor inhibition rate of 4T1 tumor-bearing mice in different groups after 14 days of treatment (n=6). Data are shown as mean  $\pm$  SD, p-values are calculated using one-way ANOVA, \*\*\*\* $p < 0.0001$ .



**Table S1.** Specific information about Western blotting primary antibodies.

| <b>Antibody name</b> | <b>Molecular weight (kDa)</b> | <b>Dilutions</b> | <b>Purchasing company</b> |
|----------------------|-------------------------------|------------------|---------------------------|
| Bcl-2                | 26                            | 1:1000           | Proteintech               |
| Bax                  | 21                            | 1:2000           | Proteintech               |
| Caspase-3            | 17                            | 1:1000           | Abclonal                  |
| Caspase-9            | 46                            | 1:1000           | Abclonal                  |
| Cyto C               | 12~14                         | 1:1000           | Abclonal                  |
| DLAT                 | 70                            | 1:2000           | Proteintech               |
| FDX1                 | 14                            | 1:1000           | Proteintech               |
| $\beta$ -actin       | 43                            | 1:6500           | Affinity                  |
| Tubulin              | 55                            | 1:10000          | Affinity                  |

## Reference

1. S. Wang, Y. Pang, S. Hu, J. Lv, Y. Lin and M. Li, *Chem. Eng. J.*, 2023, **451**, 138864.
2. S. Liang, X. Deng, Y. Chang, C. Sun, S. Shao, Z. Xie, X. Xiao, P. a. Ma, H. Zhang, Z. Cheng and J. Lin, *Nano Lett.*, 2019, **19**, 4134-4145.
